# Supplementary material for: Phenotypic and Genotypic Comparison of Epidemic and Non-Epidemic Strains of Pseudomonas aeruginosa from Individuals with Cystic Fibrosis
Source: PubMed Central journal article supplement (PMC4657914; doi:10.1371/journal.pone.0143466), 2015-11-23
Supplement: pone.0143466.s002.pdf [file pone.0143466.s002.pdf]

**A) PES**

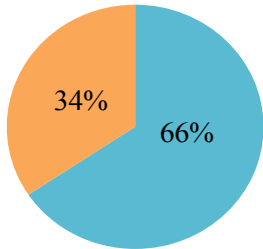

**B) OES**

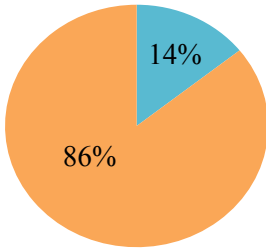

**C) Local Isolates**

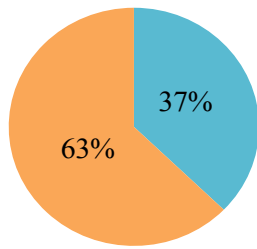

 **Mucooid**

 **Non-Mucooid**
