# Supplementary material for: Phenotypic and Genotypic Comparison of Epidemic and Non-Epidemic Strains of Pseudomonas aeruginosa from Individuals with Cystic Fibrosis
Source: PubMed Central journal article supplement (PMC4657914; doi:10.1371/journal.pone.0143466), 2015-11-23
Supplement: pone.0143466.s005.pdf [file pone.0143466.s005.pdf]

| <b>Locus</b> | <b>Function</b> | <b>Forward (5' to 3')</b> | <b>Reverse (5' to 3')</b> | <b>Amplicon size (bp)</b> |
|--------------|-----------------|---------------------------|---------------------------|---------------------------|
| <i>acsA</i>  | Amplification   | ACCTGGTGTACGCCTCGCTGAC    | GACATAGATGCCCTGCCCTTGAT   | 842                       |
|              | Sequencing      | GCCACACCTACATCGTCTAT      | GTTGCCGAGGTTGCCAC         | 430                       |
| <i>aroE</i>  | Amplification   | TGGGGCTATGACTGGAAACC      | TAACCCGGTTTTGTGATTCCTACA  | 1053                      |
|              | Sequencing      | ATGTCACCGTGCCGTTCAAG      | TGAAGGCAGTCGGTTCCTTG      | 498                       |
| <i>guaA</i>  | Amplification   | CGGCCTCGACGTGTGGATGA      | GAACGCCTGGCTGGTCTTGTGGTA  | 940                       |
|              | Sequencing      | AGGTCGGTTCCTCCAAGGTC      | GACGTTGTGGTGCGACTTGA      | 413                       |
| <i>mutL</i>  | Amplification   | TGGCCAAGGAACTCCTGGAA      | GGCCGGGTATAGGCGGAATA      | 1123                      |
|              | Sequencing      | AGAAGACCGAGTTCGACCAT      | GGTGCCATAGAGGAAGTCAT      | 482                       |
| <i>nuoD</i>  | Amplification   | ACCGCCACCCGTATCTG         | TCTCGCCCATCTTGACCA        | 1042                      |
|              | Sequencing      | ACGGCGAGAACGAGGACTAC      | GCGGTCGGTGAAGGTGAA        | 404                       |
| <i>ppsA</i>  | Amplification   | GGTCGCTCGGTCAAGGTAGTGG    | GGGTTCTCTTCTTCCGGCTCGTAG  | 989                       |
|              | Sequencing      | GGTGACGACGGCAAGCTGTA      | TATCGCCTTCGGCACAGG        | 410                       |
| <i>trpE</i>  | Amplification   | GCGGCCAGGGTTCGTGAG        | CCCGGCGCTTGTTGATGGTT      | 811                       |
|              | Sequencing      | TTCAACTTCGGCGACTTCCA      | GGTGCCATGTTGCCGTTCC       | 483                       |
