# Supplementary material for: Phenotypic and Genotypic Comparison of Epidemic and Non-Epidemic Strains of Pseudomonas aeruginosa from Individuals with Cystic Fibrosis
Source: PubMed Central journal article supplement (PMC4657914; doi:10.1371/journal.pone.0143466), 2015-11-23
Supplement: pone.0143466.s006.pdf [file pone.0143466.s006.pdf]

| Patient | Strain | Early/<br>Late | Type          | Allele Type |      |      |      |      |      |      | Sequence<br>Type |
|---------|--------|----------------|---------------|-------------|------|------|------|------|------|------|------------------|
|         |        |                |               | acsA        | aroE | guaA | mutL | nuoD | ppsA | trpE |                  |
| A12     | 233    | Early          | PES<br>Stable | 1           | 5    | 7    | 5    | 4    | 4    | 2    | 192              |
|         | 234    | Early          | PES<br>Stable | 1           | 5    | 132  | 5    | 4    | 4    | 2    | 1495             |
|         | 24     | Late           | PES<br>Stable | 1           | 5    | 7    | 5    | 4    | 4    | 2    | 192              |
|         | 25     | Late           | PES<br>Stable | 1           | 5    | 7    | 5    | 4    | 4    | 2    | 192              |
| A25     | 590    | Early          | PES<br>Stable | 1           | 5    | 7    | 5    | 4    | 4    | 2    | 192              |
|         | 591    | Early          | PES<br>Stable | 1           | 5    | 7    | 5    | 4    | 4    | 2    | 192              |
|         | 592    | Early          | PES<br>Stable | 1           | 5    | 7    | 5    | 4    | 4    | 2    | 192              |
|         | 47     | Late           | PES<br>Stable | 1           | 5    | 7    | 5    | 4    | 4    | 2    | 192              |
|         | 48     | Late           | PES<br>Stable | 1           | 5    | 7    | 5    | 4    | 4    | 2    | 192              |
| A32     | 222    | Early          | PES<br>Stable | 1           | 5    | 7    | 5    | 4    | 4    | 2    | 192              |
|         | 60     | Late           | PES<br>Stable | 1           | 5    | 7    | 5    | 4    | 4    | 2    | 192              |
|         | 61     | Late           | PES<br>Stable | 1           | 5    | 7    | 5    | 4    | 4    | 2    | 192              |
|         | 62     | Late           | PES<br>Stable | 1           | 5    | 7    | 5    | 4    | 4    | 2    | 192              |
| A41     | 577    | Early          | PES<br>Stable | 1           | 5    | 7    | 5    | 4    | 4    | 2    | 192              |
|         | 578    | Early          | PES<br>Stable | 1           | 5    | 7    | 5    | 4    | 4    | 2    | 192              |
|         | 79     | Late           | PES<br>Stable | 1           | 5    | 7    | 5    | 4    | 4    | 2    | 192              |
|         | 80     | Late           | PES<br>Stable | 1           | 5    | 7    | 5    | 4    | 4    | 2    | 192              |
| A97     | 622    | Early          | PES<br>Stable | 1           | 5    | 7    | 5    | 4    | 4    | 2    | 192              |
|         | 623    | Early          | PES<br>Stable | 1           | 5    | 7    | 5    | 4    | 4    | 2    | 192              |
|         | 173    | Late           | PES<br>Stable | 1           | 5    | 7    | 5    | 4    | 4    | 2    | 192              |
|         | 174    | Late           | PES<br>Stable | 1           | 5    | 7    | 5    | 4    | 4    | 2    | 192              |
|         | 175    | Late           | PES<br>Stable | 1           | 5    | 7    | 5    | 4    | 4    | 2    | 192              |
|         | 176    | Late           | PES<br>Stable | 1           | 5    | 7    | 5    | 4    | 4    | 2    | 192              |
| ---     | 22A    | ---            | Strain A      | 6           | 5    | 11   | 3    | 4    | 23   | 1    | 146              |
| ---     | 27A    | ---            | Strain A      | 6           | 5    | 11   | 3    | 4    | 23   | 1    | 146              |
| ---     | 56A    | ---            | Strain A      | 6           | 5    | 11   | 3    | 4    | 4    | 1    | 683              |
| ---     | 19A    | ---            | Strain A      | 6           | 5    | 11   | 3    | 4    | 4    | 1    | 683              |
| ---     | 54A    | ---            | Strain A      | 6           | 5    | 11   | 3    | 4    | 23   | 1    | 146              |
| ---     | 63A    | ---            | Strain A      | 6           | 5    | 11   | 3    | 4    | 23   | 1    | 146              |

|      |           |       |              |                    |     |     |    |    |    |     |      |
|------|-----------|-------|--------------|--------------------|-----|-----|----|----|----|-----|------|
| ---  | 132A      | ---   | Strain A     | 6                  | 5   | 11  | 3  | 4  | 23 | 1   | 146  |
| ---  | 9A        | ---   | Strain A     | 6                  | 5   | 11  | 3  | 4  | 23 | 1   | 146  |
| ---  | 29A       | ---   | Strain A     | 6                  | 5   | 11  | 3  | 4  | 23 | 1   | 146  |
| ---  | 53A       | ---   | Strain A     | 6                  | 5   | 11  | 3  | 4  | 23 | 1   | 146  |
| ---  | 201       | ---   | LES          | 6                  | 5   | 11  | 3  | 4  | 23 | 1   | 146  |
| ---  | 203       | ---   | LES          | 6                  | 5   | 11  | 3  | 4  | 23 | 1   | 146  |
| ---  | 219       | ---   | LES          | Untypeable by MLST |     |     |    |    |    |     |      |
| ---  | 220       | ---   | LES          | 6                  | 5   | 11  | 3  | 4  | 23 | 1   | 146  |
| ---  | 228       | ---   | LES          | 6                  | 5   | 11  | 3  | 4  | 23 | 1   | 146  |
| ---  | 229       | ---   | LES          | 6                  | 5   | 11  | 3  | 4  | 23 | 1   | 146  |
| ---  | 119B      | ---   | Strain B     | 6                  | 68  | 20  | 11 | 4  | 4  | 7   | 439  |
| ---  | 5B        | ---   | Strain B     | 6                  | 68  | 20  | 11 | 4  | 4  | 7   | 439  |
| ---  | 3-9B      | ---   | Strain B     | 11                 | 5   | New | 3  | 4  | 4  | 61  | New  |
| ---  | 7B        | ---   | Strain B     | 6                  | 68  | 20  | 11 | 4  | 4  | 7   | 439  |
| ---  | 20B       | ---   | Strain B     | Untypeable by MLST |     |     |    |    |    |     |      |
| ---  | 6-9B      | ---   | Strain B     | 6                  | 68  | 20  | 11 | 4  | 4  | 7   | 439  |
| ---  | 23B       | ---   | Strain B     | 6                  | 68  | 20  | 11 | 4  | 4  | 7   | 439  |
| ---  | 8B        | ---   | Strain B     | 6                  | 68  | 20  | 11 | 4  | 4  | 7   | 439  |
| ---  | 204       | ---   | Md1          | 17                 | 5   | 1   | 3  | 13 | 6  | 7   | 148  |
| ---  | 208       | ---   | Md1          | 17                 | 5   | 1   | 3  | 13 | 6  | 7   | 148  |
| ---  | 222       | ---   | MES          | 28                 | 5   | 11  | 18 | 4  | 13 | 7   | New  |
| ---  | AUST-01RA | ---   | AUST-01      | 11                 | 84  | 11  | 3  | 4  | 4  | 7   | 649  |
| ---  | AUST-01RB | ---   | AUST-01      | 11                 | 84  | 11  | 3  | 4  | 4  | 7   | 649  |
| ---  | 209       | ---   | AUST-01      | 11                 | 84  | 11  | 3  | 4  | 4  | 7   | 649  |
| ---  | AUST-02A  | ---   | AUST-02      | 28                 | 5   | 11  | 5  | 4  | 4  | 7   | 775  |
| ---- | AUST-02B  | ---   | AUST-02      | 28                 | 5   | 11  | 5  | 4  | 4  | 7   | 775  |
| ---  | AUST-03   | ---   | AUST-03      | 28                 | 5   | 5   | 11 | 3  | 15 | 44  | 242  |
| ---  | AUST-04   | ---   | AUST-04      | 16                 | 125 | 30  | 72 | 4  | 13 | 7   | 787  |
| ---  | P42       | ---   | AUST-06      | 17                 | 126 | 11  | 3  | 11 | 12 | 111 | New  |
| A2   | 588       | Early | Local Stable | 11                 | 5   | 11  | 11 | 3  | 6  | 27  | 569  |
|      | 589       | Early | Local Stable | 11                 | 5   | 11  | 11 | 3  | 6  | 27  | 569  |
|      | 3         | Late  | Local Stable | 11                 | 5   | 11  | 11 | 3  | 6  | 27  | 569  |
| A9   | 240       | Early | Local Stable | 28                 | 5   | 11  | 5  | 15 | 12 | 7   | 807  |
|      | 19        | Late  | Local Stable | 28                 | 5   | 11  | 5  | 15 | 12 | 7   | 807  |
|      | 20        | Late  | Local Stable | 28                 | 5   | 11  | 5  | 15 | 12 | 7   | 807  |
| A14  | 210       | Early | Local Stable | 11                 | 150 | 11  | 7  | 27 | 6  | 7   | 1207 |
|      | 211       | Early | Local Stable | 11                 | 150 | 11  | 7  | 27 | 6  | 7   | 1207 |
|      | 27        | Late  | Local Stable | 11                 | 150 | 11  | 7  | 27 | 6  | 7   | 1207 |
|      | 28        | Late  | Local Stable | 11                 | 150 | 11  | 7  | 27 | 6  | 7   | 1207 |
| A18  | 602       | Early | Local        | 36                 | 27  | 28  | 3  | 4  | 13 | 7   | 179  |

|      |     |       |              |                    |     |     |     |    |    |     |      |
|------|-----|-------|--------------|--------------------|-----|-----|-----|----|----|-----|------|
|      |     |       | Stable       |                    |     |     |     |    |    |     |      |
|      | 603 | Early | Local Stable | 36                 | 27  | 28  | 3   | 4  | 13 | 7   | 179  |
|      | 34  | Late  | Local Stable | 36                 | 176 | 28  | 150 | 4  | 13 | 176 | 1745 |
|      | 35  | Late  | Local Stable | 147                | 27  | 28  | 3   | 4  | 13 | 7   | 1494 |
|      | 36  | Late  | Local Stable | 36                 | 27  | 28  | 3   | 4  | 13 | 7   | 179  |
| A34  | 595 | Early | Local Stable | 36                 | 5   | 36  | 3   | 3  | 13 | 7   | 1499 |
|      | 66  | Late  | Local Stable | 28                 | 5   | 36  | 3   | 3  | 13 | 7   | 155  |
|      | 67  | Late  | Local Stable | 28                 | 5   | 36  | 3   | 3  | 13 | 7   | 155  |
| A35  | 247 | Early | Local Stable | 11                 | 22  | New | 11  | 4  | 15 | 19  | New  |
|      | 68  | Late  | Local Stable | 11                 | 22  | 1   | 11  | 4  | 15 | 19  | New  |
| A40  | 625 | Early | Local Stable | 16                 | 22  | 5   | 11  | 4  | 6  | 10  | 609  |
|      | 77  | Late  | Local Stable | 16                 | 22  | 5   | 11  | 4  | 6  | 10  | 609  |
|      | 78  | Late  | Local Stable | 16                 | 22  | 5   | 11  | 4  | 6  | 10  | 609  |
| A51  | 583 | Early | Local Stable | 6                  | 5   | 1   | 4   | 4  | 6  | 17  | 1747 |
|      | 95  | Late  | Local Stable | 6                  | 5   | 1   | 4   | 4  | 6  | 17  | 1747 |
| A52  | 584 | Early | Local Stable | 36                 | 27  | 28  | 3   | 4  | 13 | 7   | 179  |
|      | 585 | Early | Local Stable | 36                 | 27  | 28  | 3   | 4  | 13 | 7   | 179  |
|      | 97  | Late  | Local Stable | 36                 | 27  | 28  | 3   | 4  | 13 | 7   | 179  |
| A64  | 243 | Early | Local Stable | 13                 | 4   | 5   | 5   | 12 | 7  | 15  | 308  |
|      | 244 | Early | Local Stable | 13                 | 4   | 5   | 5   | 12 | 7  | 15  | 308  |
|      | 119 | Late  | Local Stable | 13                 | 4   | 5   | 5   | 12 | 7  | 172 | 1746 |
|      | 120 | Late  | Local Stable | Untypeable by MLST |     |     |     |    |    |     |      |
| A85  | 630 | Early | Local Stable | 16                 | 5   | 30  | New | 4  | 13 | 7   | New  |
|      | 153 | Late  | Local Stable | 16                 | 5   | 30  | 11  | 4  | 13 | 7   | 1748 |
| A129 | 637 | Early | Local Stable | 36                 | 27  | 28  | 3   | 4  | 13 | 7   | 179  |
|      | 638 | Early | Local Stable | 36                 | 27  | 28  | 3   | 4  | 13 | 7   | 179  |
|      | 639 | Early | Local Stable | 36                 | 27  | 28  | 3   | 4  | 13 | 7   | 179  |
|      | 284 | Late  | Local Stable | 36                 | 27  | 28  | 148 | 4  | 13 | 7   | 1496 |
| A11  | 604 | Early | Displaced    | 23                 | 5   | 11  | 7   | 1  | 12 | 7   | 274  |

|      |     |       |                   |    |    |    |    |   |    |    |      |
|------|-----|-------|-------------------|----|----|----|----|---|----|----|------|
|      |     |       | Local             |    |    |    |    |   |    |    |      |
|      | 23  | Late  | Replacement PES   | 1  | 5  | 7  | 5  | 4 | 4  | 2  | 192  |
| A43  | 261 | Early | Displaced Local   | 6  | 5  | 6  | 7  | 4 | 6  | 7  | 27   |
|      | 83  | Late  | Replacement PES   | 1  | 5  | 7  | 5  | 4 | 4  | 2  | 192  |
|      | 84  | Late  | Replacement PES   | 1  | 5  | 7  | 5  | 4 | 4  | 2  | 192  |
| A78  | 568 | Early | Displaced Local   | 11 | 20 | 1  | 65 | 4 | 4  | 10 | 381  |
|      | 569 | Early | Displaced Local   | 11 | 20 | 1  | 65 | 4 | 4  | 10 | 381  |
|      | 570 | Early | Displaced Local   | 11 | 20 | 1  | 65 | 4 | 4  | 10 | 381  |
|      | 571 | Early | Displaced Local   | 17 | 22 | 5  | 3  | 1 | 14 | 3  | 389  |
|      | 142 | Late  | Replacement PES   | 1  | 5  | 7  | 5  | 4 | 4  | 2  | 192  |
|      | 143 | Late  | Replacement PES   | 1  | 5  | 7  | 5  | 4 | 4  | 2  | 192  |
| A131 | 290 | Early | Displaced Local   | 39 | 5  | 4  | 7  | 3 | 15 | 2  | 1497 |
|      | 291 | Late  | Replacement PES   | 1  | 5  | 7  | 5  | 4 | 4  | 2  | 192  |
| A134 | 381 | Early | Displaced Local   | 7  | 5  | 12 | 3  | 4 | 1  | 7  | 549  |
|      | 382 | Early | Displaced Local   | 7  | 5  | 12 | 3  | 4 | 1  | 7  | 549  |
|      | 383 | Late  | Replacement PES   | 1  | 5  | 7  | 5  | 4 | 4  | 2  | 192  |
|      | 384 | Late  | Replacement PES   | 1  | 5  | 7  | 5  | 4 | 4  | 2  | 192  |
|      | 385 | Late  | Replacement PES   | 1  | 5  | 7  | 5  | 4 | 4  | 2  | 192  |
| A8   | 654 | Early | Displaced Local   | 16 | 5  | 20 | 5  | 4 | 4  | 10 | 1498 |
|      | 16  | Late  | Replacement Local | 23 | 5  | 11 | 7  | 1 | 12 | 7  | 274  |
|      | 17  | Late  | Replacement Local | 23 | 5  | 11 | 7  | 1 | 12 | 7  | 274  |
|      | 18  | Late  | Replacement Local | 23 | 5  | 11 | 7  | 1 | 12 | 7  | 274  |
