# Supplementary material for: Phenotypic and Genotypic Comparison of Epidemic and Non-Epidemic Strains of Pseudomonas aeruginosa from Individuals with Cystic Fibrosis
Source: PubMed Central journal article supplement (PMC4657914; doi:10.1371/journal.pone.0143466), 2015-11-23
Supplement: pone.0143466.s007.pdf [file pone.0143466.s007.pdf]

| Assay                               | PES vs OES                  |                            | PES vs Local Isolates       |                            | OES vs Local Isolates        |                            |
|-------------------------------------|-----------------------------|----------------------------|-----------------------------|----------------------------|------------------------------|----------------------------|
|                                     | p-value                     | Group with higher activity | p-value                     | Group with higher activity | p-value                      | Group with higher activity |
| <b>Protease</b>                     | <b>3.25x10<sup>-4</sup></b> | PES                        | 0.113<br>0.322              | ---                        | <b>0.0106</b>                | Local Isolates             |
| <b>Elastase</b>                     | 1<br>0.0335                 | ---                        | 0.0652<br>0.512             | ---                        | <b>3.93x10<sup>-3</sup></b>  | Local Isolates             |
| <b>Lipase</b>                       | <b>6.76x10<sup>-3</sup></b> | OES                        | 0.914<br>0.322              | ---                        | <b>6.79x10<sup>-3</sup></b>  | OES                        |
| <b>Swarm</b>                        | 0.973<br>0.0549             | ---                        | 0.916<br>0.200              | ---                        | 0.255<br>0.967               | ---                        |
| <b>Swim</b>                         | 0.197<br>0.0539             | ---                        | 0.360<br>0.412              | ---                        | 0.0307<br>0.640              | ---                        |
| <b>Biofilm Biomass</b>              | <b>2.01x10<sup>-5</sup></b> | PES                        | 0.590<br>0.218              | ---                        | <b>2.67x10<sup>-5</sup></b>  | Local Isolates             |
| <b>Biofilm Growth</b>               | 1<br>0.0281                 | ---                        | <b>4.66x10<sup>-3</sup></b> | Local Isolates             | <b>1.92x10<sup>-3</sup></b>  | Local Isolates             |
| <b>Planktonic Growth</b>            | 0.923<br>0.0106             | ---                        | 0.0202<br>0.496             | ---                        | <b>1.92x10<sup>-3</sup></b>  | Local Isolates             |
| <b>Tobramycin Susceptibility</b>    | <b>5.00x10<sup>-4</sup></b> | PES                        | 0.0177<br>1                 | ---                        | <b>9.95x10<sup>-11</sup></b> | Local Isolates             |
| <b>Ceftazidime Susceptibility</b>   | 1<br>0.0116                 | ---                        | 0.184<br>0.978              | ---                        | <b>8.51x10<sup>-6</sup></b>  | Local Isolates             |
| <b>Ciprofloxacin Susceptibility</b> | <b>3.47x10<sup>-3</sup></b> | PES                        | 0.0442<br>1                 | ---                        | <b>6.46x10<sup>-8</sup></b>  | Local Isolates             |
| <b>Meropenem Susceptibility</b>     | <b>3.67x10<sup>-5</sup></b> | PES                        | 0.0506<br>1                 | ---                        | <b>1.57x10<sup>-10</sup></b> | Local Isolates             |

1
