# Supplementary material for: Phenotypic and Genotypic Comparison of Epidemic and Non-Epidemic Strains of Pseudomonas aeruginosa from Individuals with Cystic Fibrosis
Source: PubMed Central journal article supplement (PMC4657914; doi:10.1371/journal.pone.0143466), 2015-11-23
Supplement: pone.0143466.s008.pdf [file pone.0143466.s008.pdf]

|                  | <b>PES vs OES</b> | <b>OES vs Local Isolates</b> | <b>PES vs Local Isolates</b> |
|------------------|-------------------|------------------------------|------------------------------|
| <b>Mucoidy</b>   | <b>18.554</b>     | <b>5.443</b>                 | <b>6.339</b>                 |
| <b>Hemolysis</b> | 1.158             | 1.131                        | 0.0119                       |
