# Supplementary material for: Phenotypic and Genotypic Comparison of Epidemic and Non-Epidemic Strains of Pseudomonas aeruginosa from Individuals with Cystic Fibrosis
Source: PubMed Central journal article supplement (PMC4657914; doi:10.1371/journal.pone.0143466), 2015-11-23
Supplement: pone.0143466.s009.pdf [file pone.0143466.s009.pdf]

| Assay                    | Strain Replacement          | Stable PES                  | Stable Local Isolate        |
|--------------------------|-----------------------------|-----------------------------|-----------------------------|
| <b>Protease</b>          | <b>7.87x10<sup>-4</sup></b> | 0.251                       | <b>1.29x10<sup>-4</sup></b> |
| <b>Elastase</b>          | <b>1.6x10<sup>-3</sup></b>  | 0.303                       | 0.0278                      |
| <b>Lipase</b>            | 0.0768                      | 0.593                       | 0.666                       |
| <b>Swarm</b>             | 0.559                       | 0.231                       | 0.222                       |
| <b>Swim</b>              | 0.0321                      | 0.641                       | 0.0364                      |
| <b>Biofilm Biomass</b>   | 0.0503                      | 0.208                       | 0.0773                      |
| <b>Biofilm Growth</b>    | 0.0422                      | 0.563                       | 0.122                       |
| <b>Planktonic Growth</b> | 0.133                       | 0.321                       | 0.163                       |
| <b>Tobramycin</b>        | <b>4.15x10<sup>-3</sup></b> | 0.618                       | 0.0792                      |
| <b>Ceftazidime</b>       | 0.266                       | 0.367                       | 0.781                       |
| <b>Ciprofloxacin</b>     | <b>6.99x10<sup>-4</sup></b> | 0.619                       | <b>9.54x10<sup>-4</sup></b> |
| <b>Meropenem</b>         | 0.0335                      | <b>7.92x10<sup>-4</sup></b> | 0.546                       |
